# Supplementary material
Source: PubMed Central journal article supplement (PMC10414516)

# Multimedia Appendix 1: Welcome screen of the AYUSH Sanjivani app

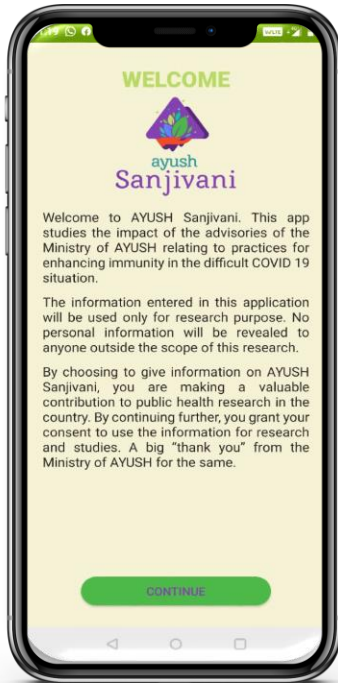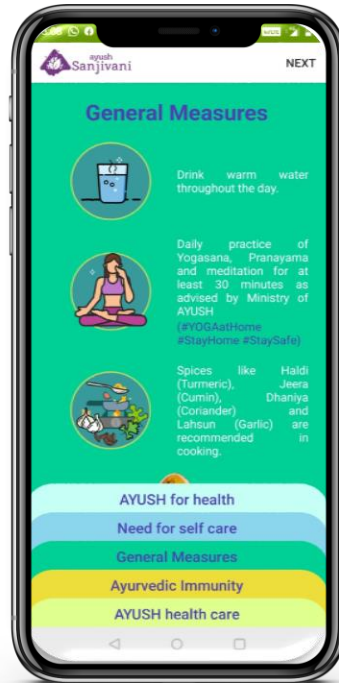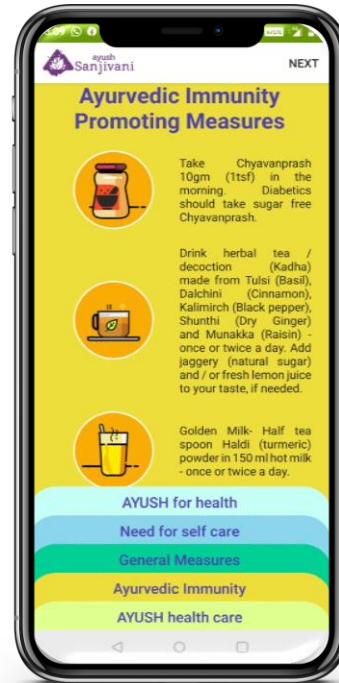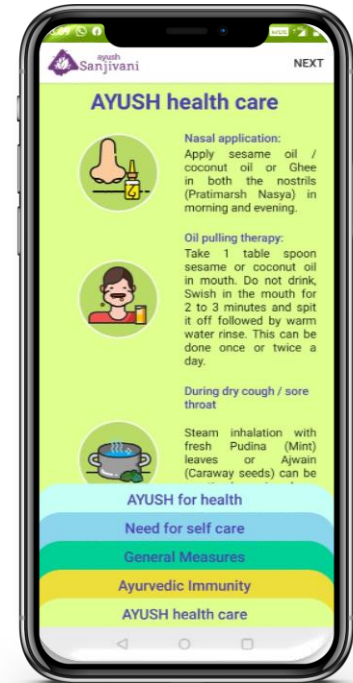

Supplement: xmed_v2i2e25703_app1.pdf [file xmed_v2i2e25703_app1.pdf]
