# Supplementary material
Source: PubMed Central journal article supplement (PMC10414516)
Supplement: xmed_v2i2e25703_app2.pdf [file xmed_v2i2e25703_app2.pdf]

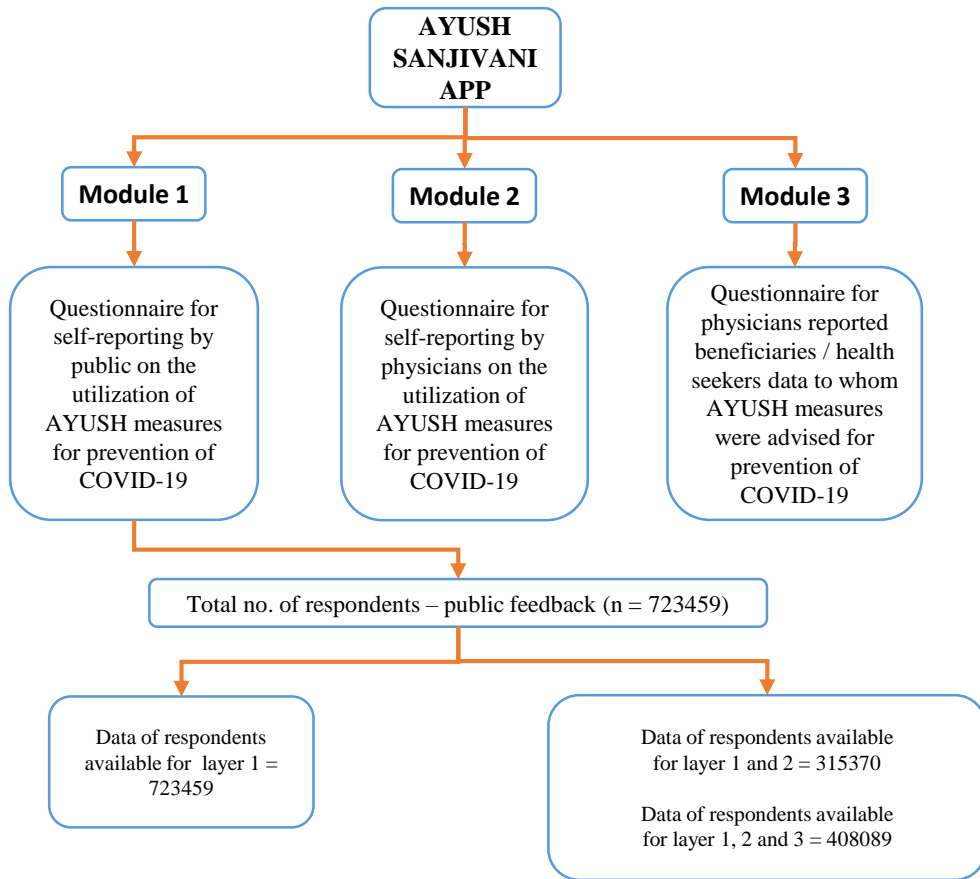

**Multimedia Appendix 2: Modules and layers of the app**
