# Supplementary material
Source: PubMed Central journal article supplement (PMC10414516)

# Multimedia Appendix 3: Detailed questionnaire

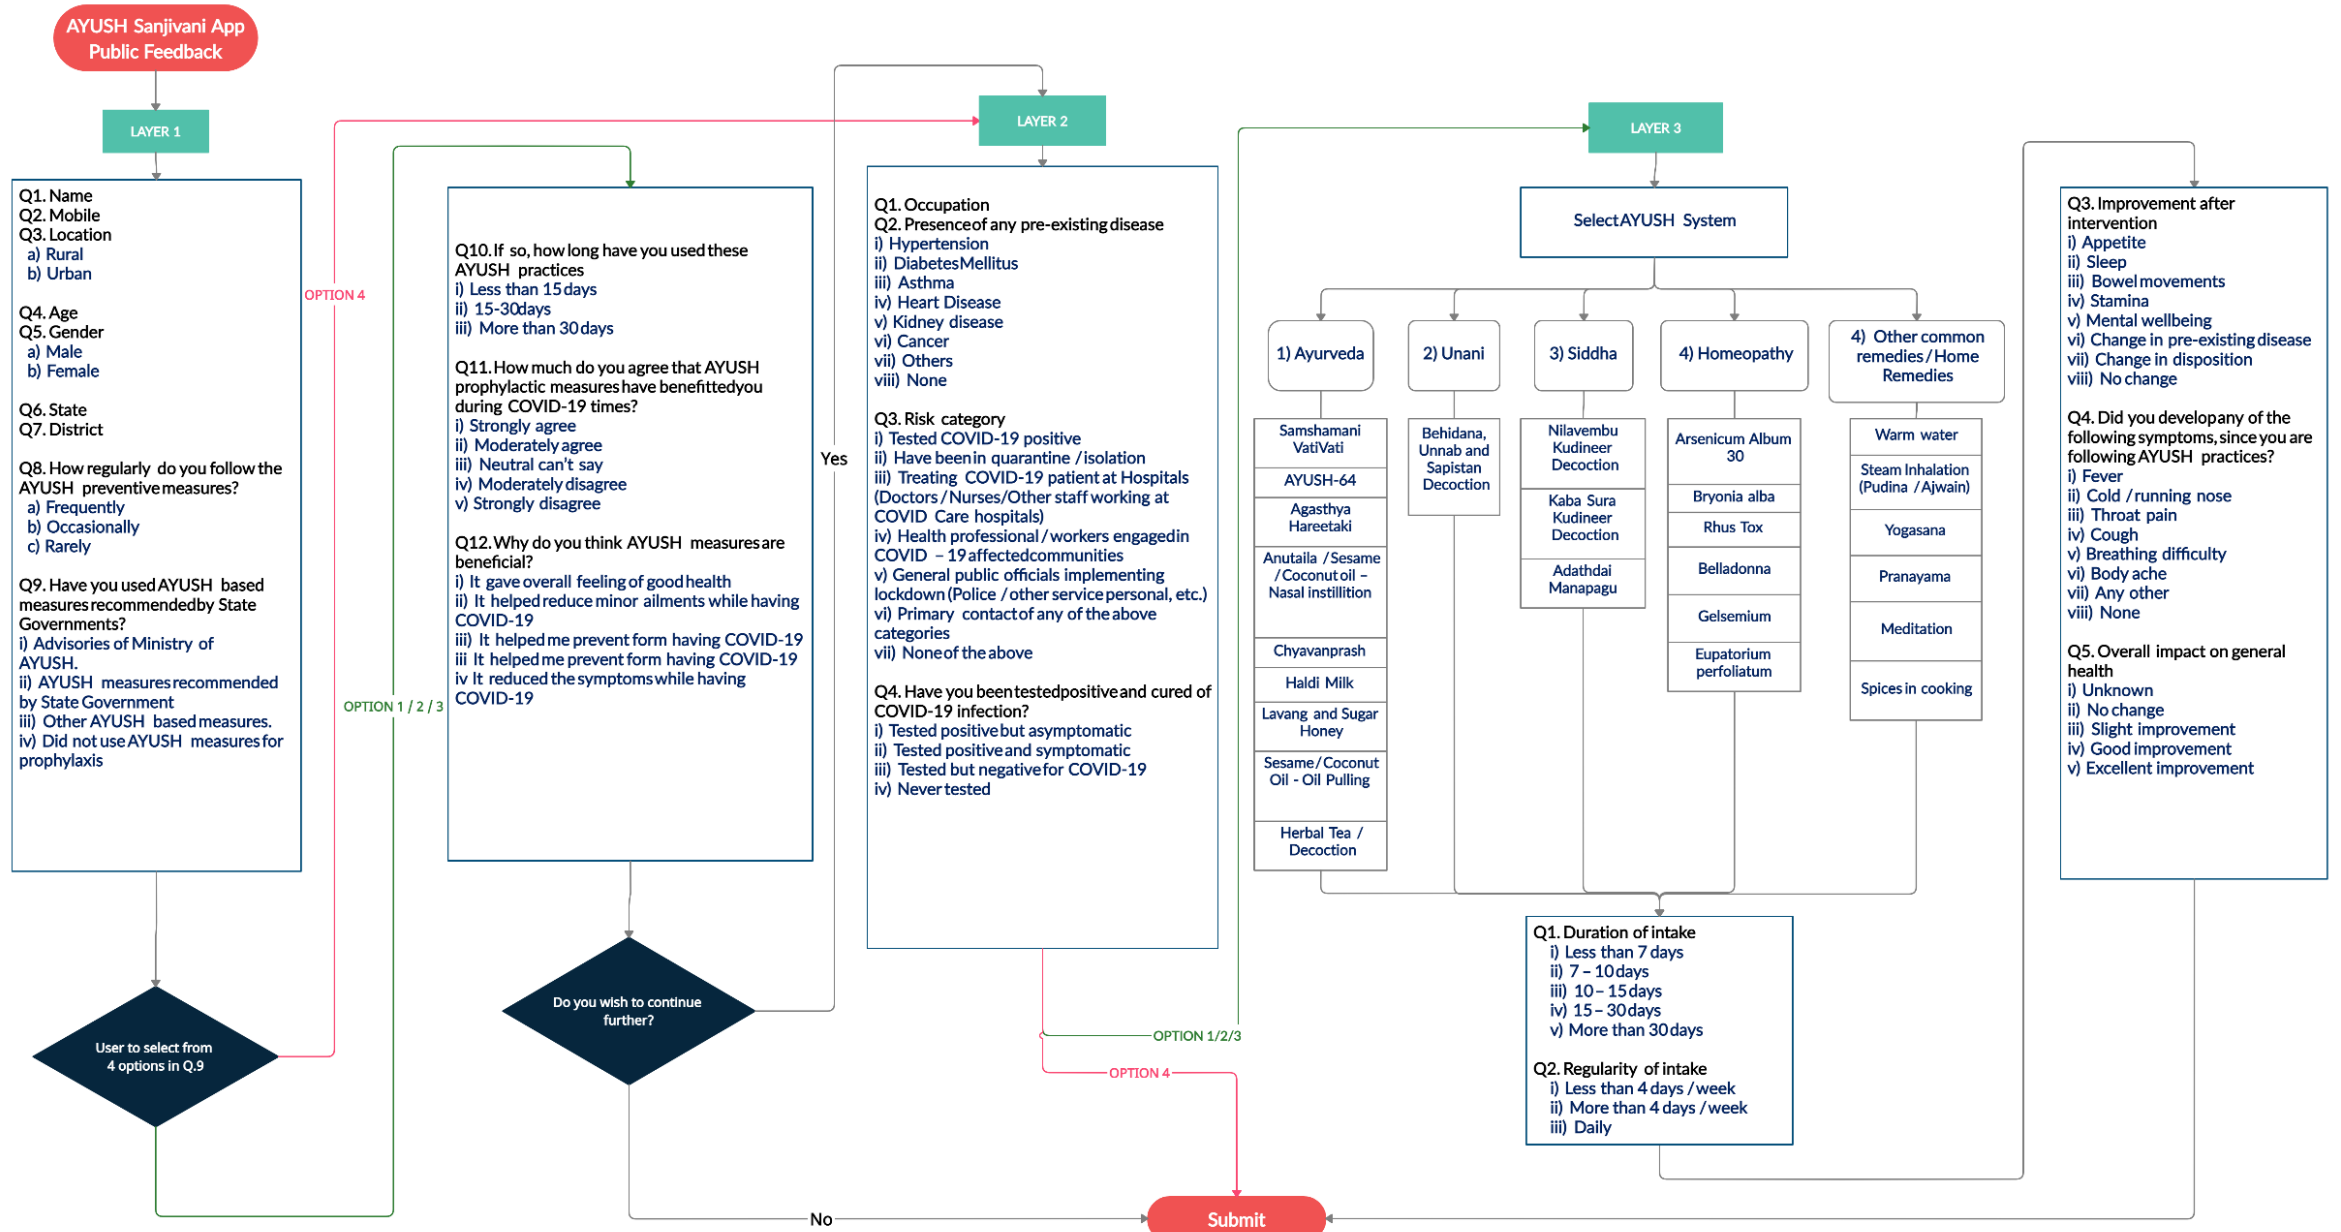

Supplement: xmed_v2i2e25703_app3.pdf [file xmed_v2i2e25703_app3.pdf]
