# Supplementary material
Source: PubMed Central journal article supplement (PMC10414516)
Supplement: xmed_v2i2e25703_app4.pdf [file xmed_v2i2e25703_app4.pdf]

Multimedia Appendix 4: State wise distribution of the respondents

| State / UTs                            | Total         | Respondents who use AYUSH measures for prevention of COVID-19 | Respondents who did not use AYUSH measures for prevention of COVID-19 |
|----------------------------------------|---------------|---------------------------------------------------------------|-----------------------------------------------------------------------|
| Uttar Pradesh                          | 178550        | 158053 (88.5%)                                                | 20497 (11.5%)                                                         |
| Maharashtra                            | 98569         | 86328 (87.6%)                                                 | 12241 (12.4%)                                                         |
| Madhya Pradesh                         | 64386         | 57894 (89.9%)                                                 | 6492 (10.1%)                                                          |
| Gujarat                                | 51857         | 46815 (90.3%)                                                 | 5042 (9.7%)                                                           |
| Chhattisgarh                           | 50057         | 44461 (88.2%)                                                 | 5596 (11.2%)                                                          |
| Rajasthan                              | 33413         | 28332 (84.8%)                                                 | 5081 (15.2%)                                                          |
| Odisha                                 | 33083         | 26302 (79.5%)                                                 | 6781 (20.5%)                                                          |
| Haryana                                | 30709         | 24656 (80.3%)                                                 | 6053 (19.7%)                                                          |
| Bihar                                  | 29398         | 24267 (82.5%)                                                 | 5131 (17.5%)                                                          |
| Karnataka                              | 28582         | 18439 (64.5%)                                                 | 10143 (35.5%)                                                         |
| West Bengal                            | 23710         | 20970 (88.4%)                                                 | 2740 (11.6%)                                                          |
| Assam                                  | 13391         | 11406 (85.2%)                                                 | 1985 (14.8%)                                                          |
| Punjab                                 | 12792         | 11276 (88.1%)                                                 | 1516 (11.9%)                                                          |
| Jharkhand                              | 10522         | 8521 (81.0%)                                                  | 2001 (19.0%)                                                          |
| Tamil Nadu                             | 10371         | 7739 (74.6%)                                                  | 2632 (25.4%)                                                          |
| Uttarakhand                            | 10149         | 8869 (87.4%)                                                  | 1280 (12.6%)                                                          |
| Delhi                                  | 8627          | 5323 (61.7%)                                                  | 3304 (38.3%)                                                          |
| Jammu & Kashmir                        | 7123          | 5456 (76.6%)                                                  | 1667 (23.4%)                                                          |
| Himachal Pradesh                       | 6442          | 5234 (81.2%)                                                  | 1208 (18.8%)                                                          |
| Kerala                                 | 6036          | 4648 (77.0%)                                                  | 1388 (23.0%)                                                          |
| Andhra Pradesh                         | 4542          | 3172 (69.8%)                                                  | 1370 (30.2%)                                                          |
| Telangana                              | 4199          | 2687 (64.0%)                                                  | 1512 (36.0%)                                                          |
| Tripura                                | 3718          | 3256 (87.6%)                                                  | 462 (12.4%)                                                           |
| Mizoram                                | 1324          | 1001 (75.6%)                                                  | 323 (24.4%)                                                           |
| Nagaland                               | 367           | 164 (44.7%)                                                   | 203 (55.3%)                                                           |
| Goa                                    | 346           | 244 (70.5%)                                                   | 102 (29.5%)                                                           |
| Sikkim                                 | 278           | 196 (70.5%)                                                   | 82 (29.5%)                                                            |
| Chandigarh                             | 197           | 116 (58.9%)                                                   | 81 (41.1%)                                                            |
| Arunachal Pradesh                      | 174           | 103 (59.2%)                                                   | 71 (40.8%)                                                            |
| Andaman & Nicobar                      | 129           | 81 (62.8%)                                                    | 48 (37.2%)                                                            |
| Puducherry                             | 126           | 94 (74.6%)                                                    | 32 (25.4%)                                                            |
| Daman & Diu                            | 99            | 72 (72.7%)                                                    | 27 (27.3%)                                                            |
| Dadra & Nagar Haveli                   | 76            | 53 (69.7%)                                                    | 23 (30.3%)                                                            |
| Meghalaya                              | 57            | 34 (59.6%)                                                    | 23 (40.4%)                                                            |
| Manipur                                | 51            | 30 (58.8%)                                                    | 21 (41.2%)                                                            |
| Ladakh                                 | 7             | 2 (28.6%)                                                     | 5 (71.4%)                                                             |
| Lakshadweep                            | 2             | 1 (50.0%)                                                     | 1 (50.0%)                                                             |
| <b>Grand Total</b>                     | <b>723459</b> | <b>616295 (85.2%)</b>                                         | <b>107164 (14.8%)</b>                                                 |
| <b>Values have been given as n (%)</b> |               |                                                               |                                                                       |
