# Supplementary material
Source: PubMed Central journal article supplement (PMC10414516)

**Multimedia Appendix 5: Distribution of respondents as per their choice of AYUSH system for maintenance of health**

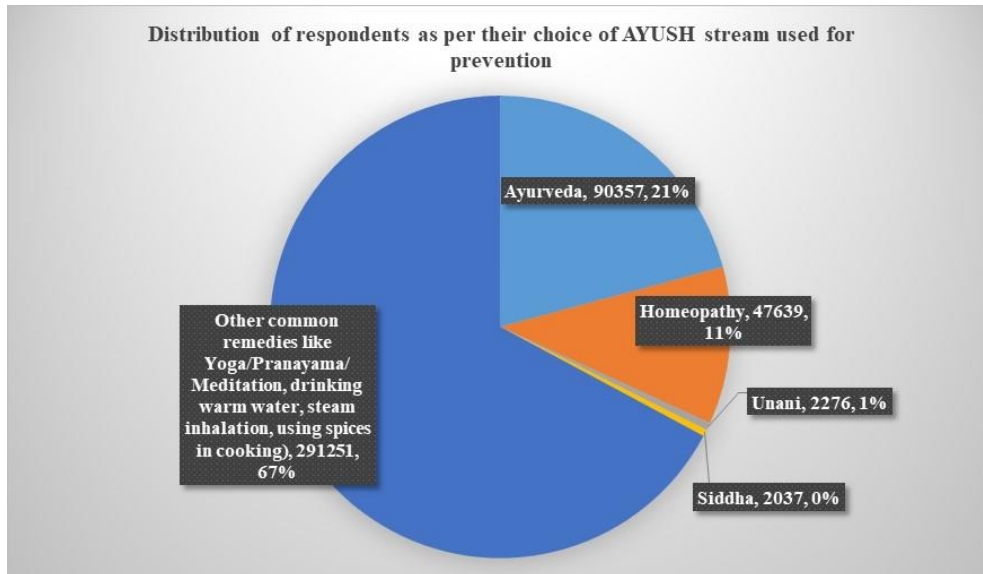

Supplement: xmed_v2i2e25703_app5.pdf [file xmed_v2i2e25703_app5.pdf]
