# Supplementary material
Source: PubMed Central journal article supplement (PMC10414516)
Supplement: xmed_v2i2e25703_app6.pdf [file xmed_v2i2e25703_app6.pdf]

**Multimedia Appendix 6: Distribution of the respondents as per their choice of AYUSH interventions / measures and the duration of use**

| Intervention                                       | Duration of use  |            |            |              |                   |
|----------------------------------------------------|------------------|------------|------------|--------------|-------------------|
|                                                    | Less than 7 days | 7-10 days  | 10-15 days | 15-30 days   | More than 30 days |
| <b>Samshamani Vati (n = 42970)</b>                 | 5968 (13.9)      | 1570 (3.7) | 1679 (3.9) | 6074 (14.1)  | 27679 (64.4)      |
| <b>AYUSH-64 (n=44882)</b>                          | 6343 (14.1)      | 2206 (4.9) | 2336 (5.2) | 4847 (10.8)  | 29150 (64.9)      |
| <b>Agastya Hareetaki (n=27923)</b>                 | 2071 (7.4)       | 591 (2.1)  | 805 (2.9)  | 2290 (8.2)   | 22166 (79.4)      |
| <b>Anuthaila / Sesame / coconut oil (n=33398)</b>  | 22756 (68.1)     | 934 (2.8)  | 1355 (4.1) | 3927 (11.8)  | 4426 (13.3)       |
| <b>Chyavanprash (n=6494)</b>                       | 913 (14.1)       | 335 (5.2)  | 497 (7.7)  | 1511 (23.3)  | 3238 (49.9)       |
| <b>Haldi Milk (n=18777)</b>                        | 2664 (14.2)      | 1153 (6.1) | 1514 (8.1) | 4037 (21.5)  | 9409 (50.1)       |
| <b>Lavang and Sugar Honey (n=13150)</b>            | 1856 (14.1)      | 692 (5.3)  | 1034 (7.9) | 4073 (31.0)  | 5495 (41.8)       |
| <b>Sesame / Coconut Oil - Nasal (n=5663)</b>       | 1171 (20.7)      | 343 (6.1)  | 518 (9.1)  | 1690 (29.8)  | 1941 (34.3)       |
| <b>Sesame / Coconut Oil - Oil Pulling (n=5363)</b> | 1099 (20.5)      | 313 (5.8)  | 477 (8.9)  | 1682 (31.4)  | 1792 (33.4)       |
| <b>Herbal Tea / Decoction (11454)</b>              | 1583 (13.8)      | 690 (6.0)  | 993 (8.7)  | 2671 (23.3)  | 5517 (48.2)       |
| <b>Arsenicum Album 30 (n=45090)</b>                | 4271 (9.5)       | 853 (1.9)  | 1821 (4.0) | 29378 (65.2) | 8767 (19.4)       |
| <b>Bryonia alba (n=3709)</b>                       | 683 (18.4)       | 245 (6.6)  | 293 (7.9)  | 1394 (37.6)  | 1094 (29.5)       |
| <b>Rhus Tox (n=3836)</b>                           | 731 (19.1)       | 254 (6.6)  | 337 (8.8)  | 1368 (35.7)  | 1146 (29.9)       |
| <b>Belladonna (n=3494)</b>                         | 655 (18.7)       | 203 (5.8)  | 302 (8.6)  | 1368 (39.2)  | 966 (27.6)        |
| <b>Gelsemium (n=3238)</b>                          | 546 (16.9)       | 177 (5.5)  | 294 (9.1)  | 1342 (41.4)  | 879 (27.1)        |
| <b>Eupatorium perfoliatum (n=3101)</b>             | 515 (16.6)       | 158 (5.1)  | 297 (9.6)  | 1299 (41.9)  | 832 (26.8)        |

|                                                        |             |            |             |              |               |
|--------------------------------------------------------|-------------|------------|-------------|--------------|---------------|
| <b>Behidana, Unnab and Sapistan Decoction (n=2274)</b> | 426 (18.7)  | 333 (14.6) | 707 (31.1)  | 390 (17.2)   | 418 (18.4)    |
| <b>Nilavembu Kudineer Decoction (n=1302)</b>           | 425 (32.6)  | 141 (10.8) | 153 (11.8)  | 151 (11.6)   | 432 (33.2)    |
| <b>Kaba Sura Kudineer Decoction (n=1488)</b>           | 418 (28.1)  | 220 (14.8) | 193 (13.0)  | 230 (15.5)   | 427 (28.7)    |
| <b>Adathdai Manapagu (n=863)</b>                       | 242 (28.0)  | 82 (9.5)   | 112 (13.0)  | 135 (15.6)   | 292 (33.8)    |
| <b>Warm water (n = 248888)</b>                         | 22324 (9.0) | 9676 (3.9) | 14412 (5.8) | 67953 (27.3) | 134523 (54.0) |
| <b>Steam Inhalation (Pudina / Ajwain) (n = 11346)</b>  | 2216 (19.5) | 953 (8.4)  | 1255 (11.1) | 3348 (29.5)  | 3574 (31.5)   |
| <b>Yogasana (n = 79207)</b>                            | 9312 (11.8) | 3459 (4.4) | 4545 (5.8)  | 11382 (14.4) | 50509 (63.9)  |
| <b>Pranayama (n = 44900)</b>                           | 5413 (12.1) | 864 (1.9)  | 1307 (2.9)  | 3637 (8.1)   | 33679 (75.0)  |
| <b>Meditation (n=12205)</b>                            | 2014 (16.5) | 738 (6.0)  | 1190 (9.8)  | 2911 (23.9)  | 5352 (43.9)   |
| <b>Spices in cooking (n=17556)</b>                     | 2200 (12.5) | 898 (5.1)  | 1320 (7.5)  | 3833 (21.8)  | 9305 (53.0)   |
| <b>Values have been reported as n (%)</b>              |             |            |             |              |               |
